# Supplementary material for: A catalyst-free approach to a novel imidazo [4,5-f][1,10] phenanthroline ligand and its corresponding ruthenium(ii) complex: insights into their applications in colorimetric anion sensing
Source: Royal Society of Chemistry journal article supplement (doi:10.1039/c4nj01077a), 2014-01-01
Supplement: c4nj01077a1.pdf [file c4nj01077a1.pdf]

Electronic Supplementary Material (ESI) for New Journal of Chemistry  
This journal is © The Royal Society of Chemistry 2014

## Supporting Information

### Catalyst-free approach to a novel imidazo [4,5-f][1,10] phenanthroline ligand and its corresponding ruthenium(II) complex: insights into their applications in colorimetric anion sensing

Hamid Khanmohammadi\* and Khatereh Rezaeian

*Department of Chemistry, Faculty of Science, Arak University, Arak 38156-8-8349, Iran*

E-mail: [h-khanmohammadi@araku.ac.ir](mailto:h-khanmohammadi@araku.ac.ir)

| Page No. | Contents                                                                                                                                                                                    |
|----------|---------------------------------------------------------------------------------------------------------------------------------------------------------------------------------------------|
| S2       | IR spectrum of 1-(3-Formyl-4-hydroxyphenylazo)-4-nitrobenzene                                                                                                                               |
| S3       | <sup>1</sup> H NMR spectrum of 1-(3-Formyl-4-hydroxyphenylazo)-4-nitrobenzene                                                                                                               |
| S4       | IR spectrum of <b>L</b>                                                                                                                                                                     |
| S5       | <sup>1</sup> H NMR spectrum of <b>L</b>                                                                                                                                                     |
| S6       | IR spectrum of <b>1</b>                                                                                                                                                                     |
| S7       | <sup>1</sup> H NMR spectrum of <b>1</b>                                                                                                                                                     |
| S8       | MALDI-TOF mass spectrum of <b>1</b>                                                                                                                                                         |
| S9       | UV-Vis titration of <b>1</b> with H <sub>2</sub> PO <sub>4</sub> <sup>-</sup> in DMSO                                                                                                       |
| S10      | Benesi Hildebrand plots for titration of <b>1</b> with anions in DMSO                                                                                                                       |
| S11      | Job's plot for <b>1</b> with anions in DMSO                                                                                                                                                 |
| S12      | UV-Vis titrations of <b>1</b> with (A) TBAF, (B) TBAOAc and (C) TBAH <sub>2</sub> PO <sub>4</sub> in 9:1, DMSO-water                                                                        |
| S13      | Benesi Hildebrand plots for titration of <b>1</b> with anions in 9:1, DMSO-water                                                                                                            |
| S14      | UV-Vis titrations of <b>L</b> with (A) TBAOAc and (B) TBAH <sub>2</sub> PO <sub>4</sub> in DMSO                                                                                             |
| S15      | Benesi Hildebrand plots for titration of <b>L</b> with AcO <sup>-</sup> and H <sub>2</sub> PO <sub>4</sub> <sup>-</sup> anions in DMSO                                                      |
| S16      | Job's plot for <b>L</b> with anions in DMSO                                                                                                                                                 |
| S17      | UV-Vis titration of <b>L</b> with (A) TBAF, (B) TBAOAc and (C) TBAH <sub>2</sub> PO <sub>4</sub> in 9:1, DMSO-water                                                                         |
| S18      | Benesi Hildebrand plots for titration of <b>L</b> with anions in 9:1, DMSO-water                                                                                                            |
| S19      | Determination of the pK <sub>a</sub> values                                                                                                                                                 |
| S20      | <sup>1</sup> H NMR spectra of <b>L</b> in DMSO- <i>d</i> <sub>6</sub> (2×10 <sup>-2</sup> mol L <sup>-1</sup> ) in the absence and presence of TBAOAc and TBAH <sub>2</sub> PO <sub>4</sub> |
| S21      | <sup>1</sup> H NMR spectra of <b>1</b> in DMSO- <i>d</i> <sub>6</sub> (2×10 <sup>-2</sup> mol L <sup>-1</sup> ) in the absence and presence of TBAOAc and TBAH <sub>2</sub> PO <sub>4</sub> |
| S22      | Fluorescence spectra of <b>L</b> (2×10 <sup>-5</sup> mol L <sup>-1</sup> ) in the presence of several different anions                                                                      |

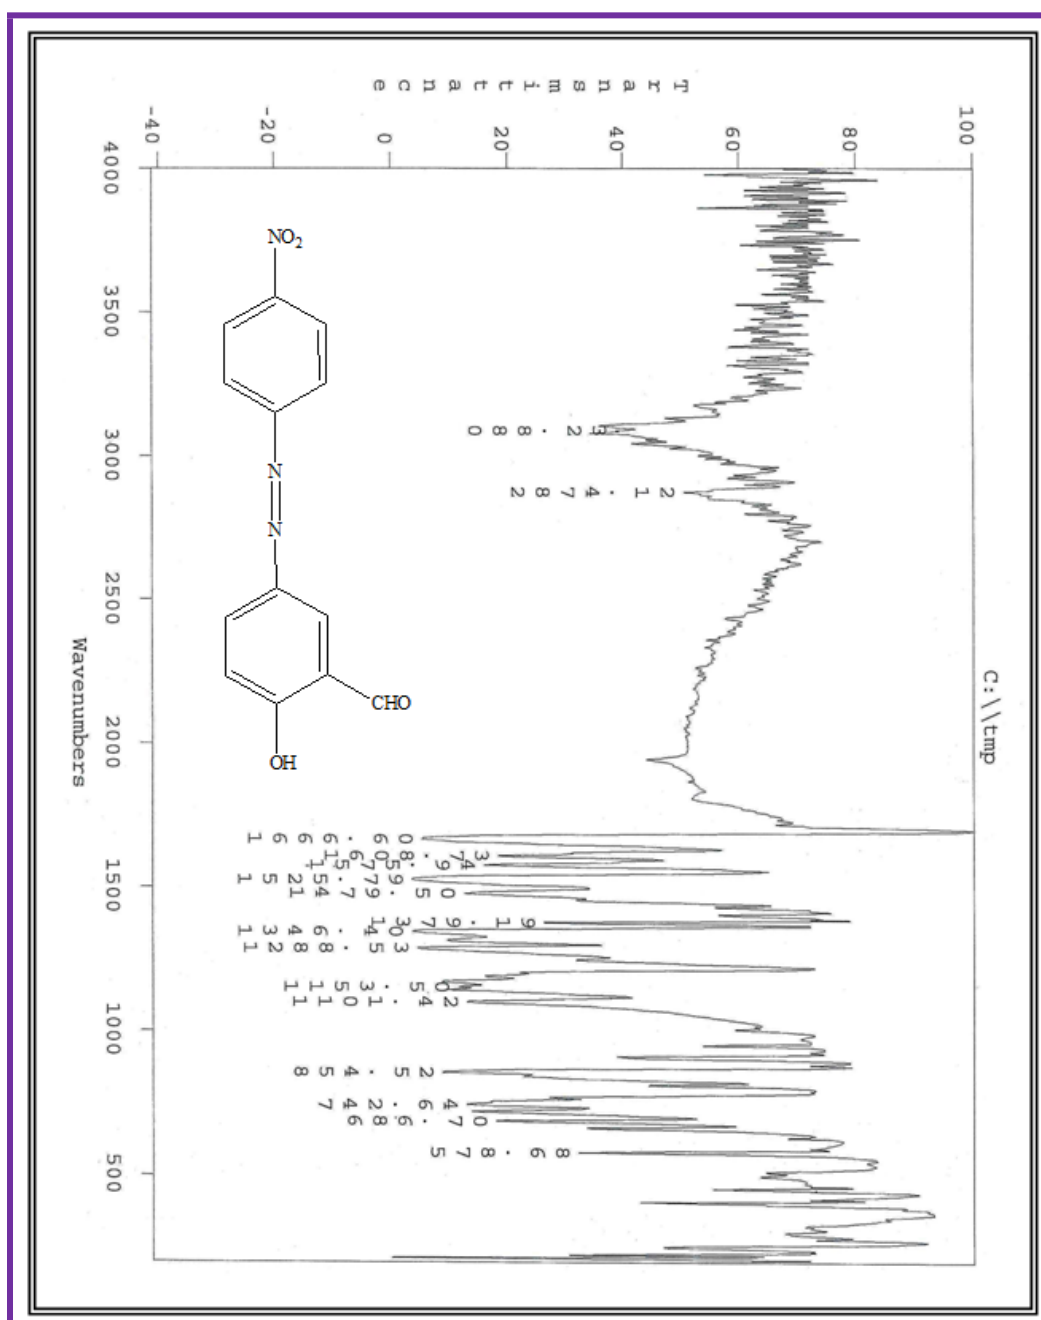

Figure S1. IR spectrum of 1-(3-Formyl-4-hydroxyphenylazo)-4-nitrobenzene

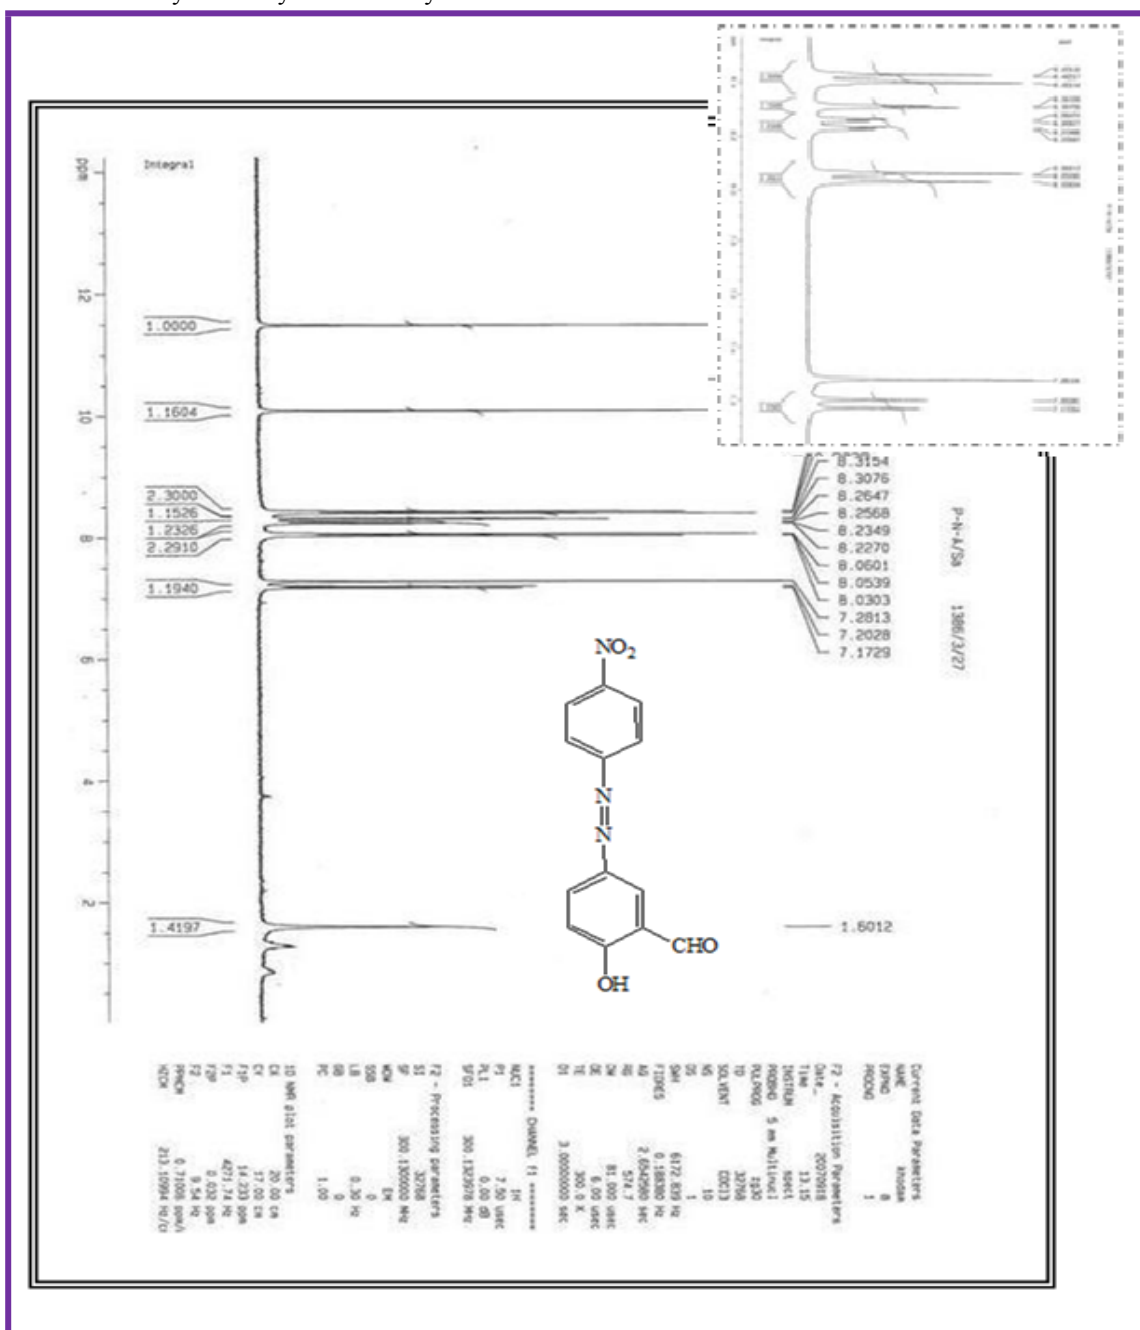

**Figure S2.** <sup>1</sup>H NMR spectrum of 1-(3-Formyl-4-hydroxyphenylazo)-4-nitrobenzene

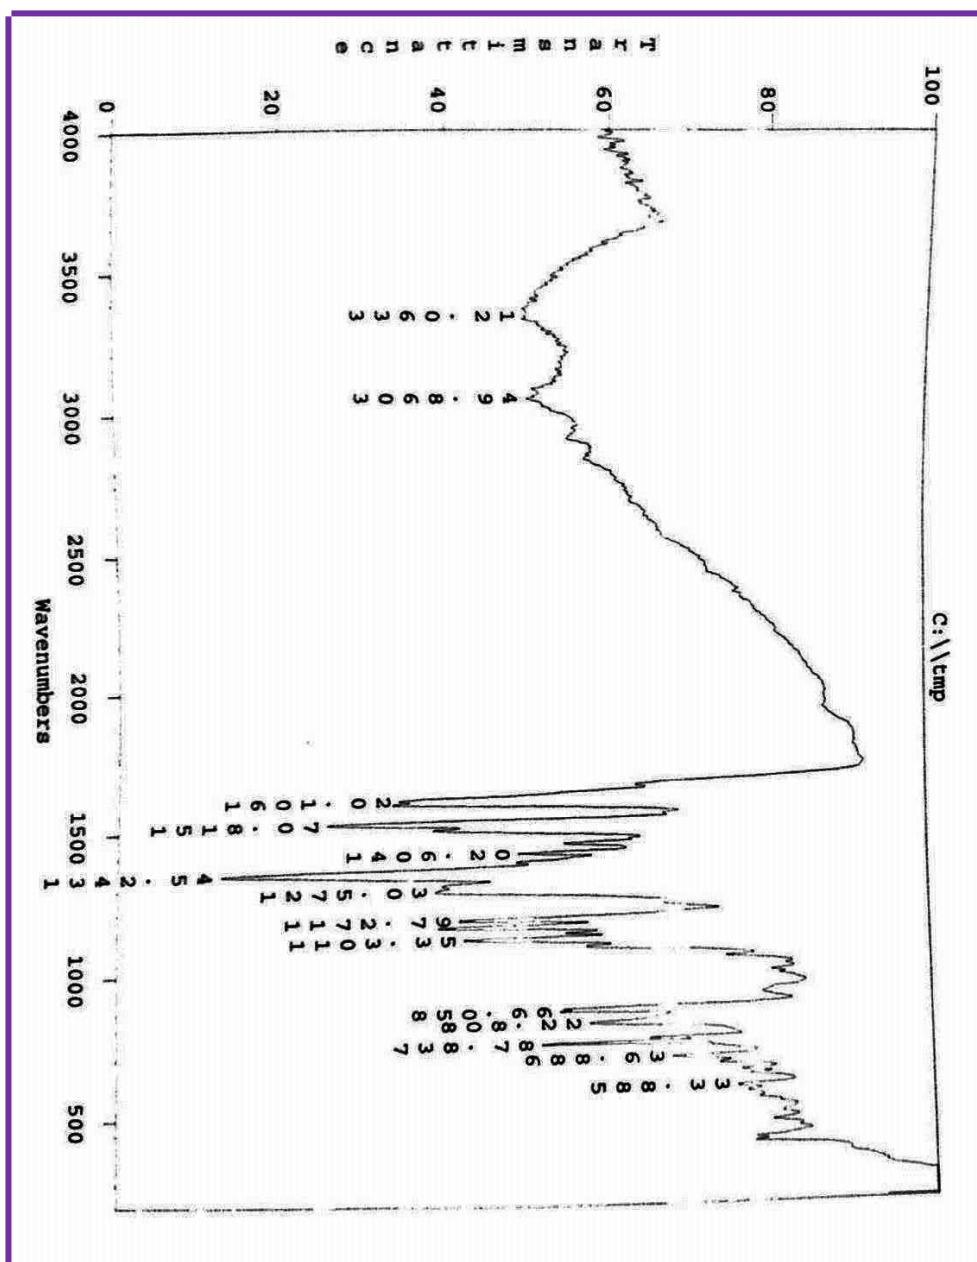

Figure S3. IR spectrum of L

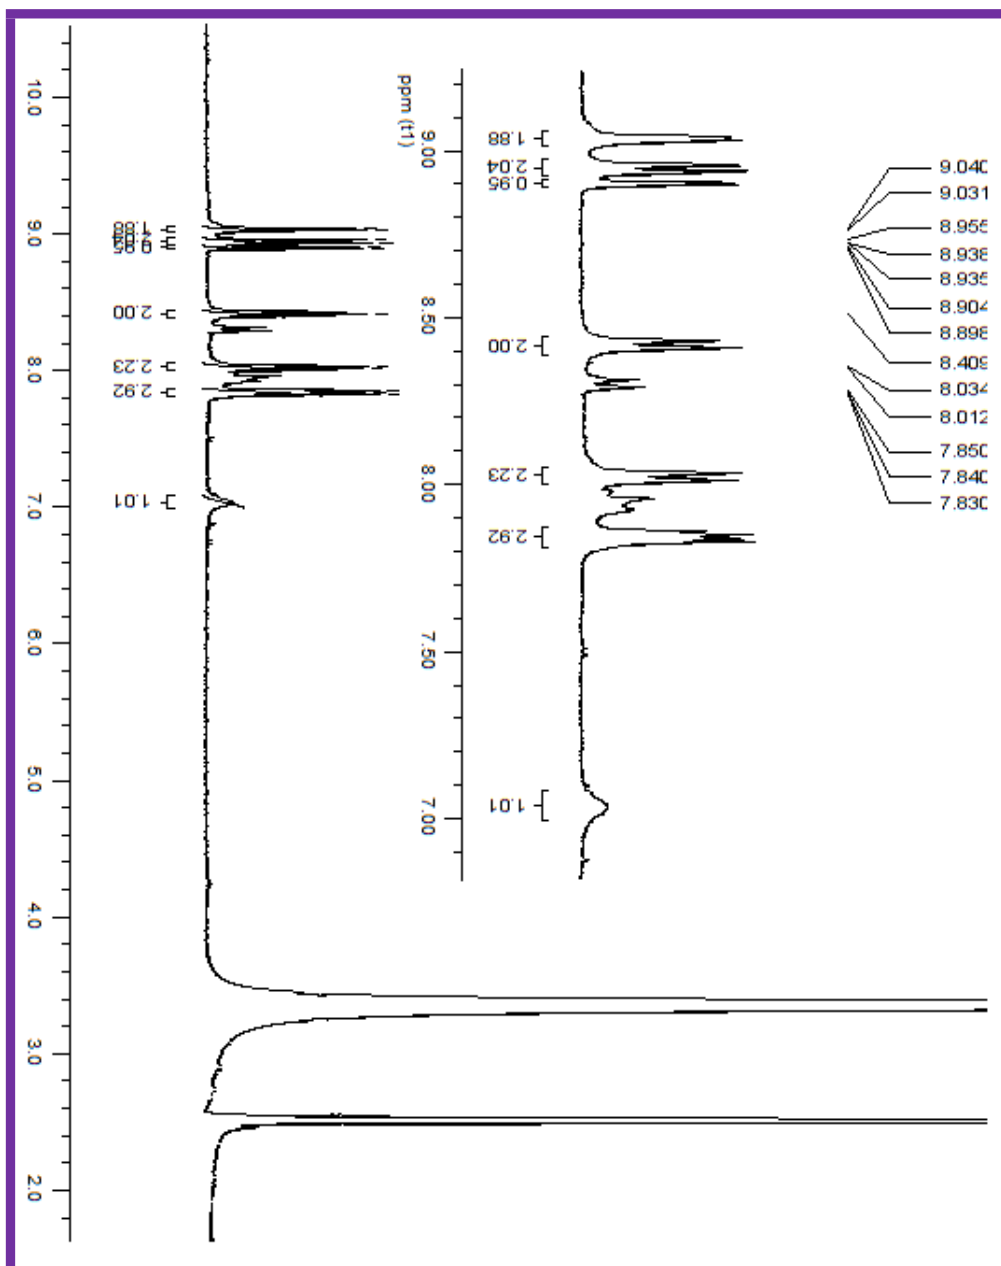

Figure S4.  $^1\text{H}$  NMR spectrum of L



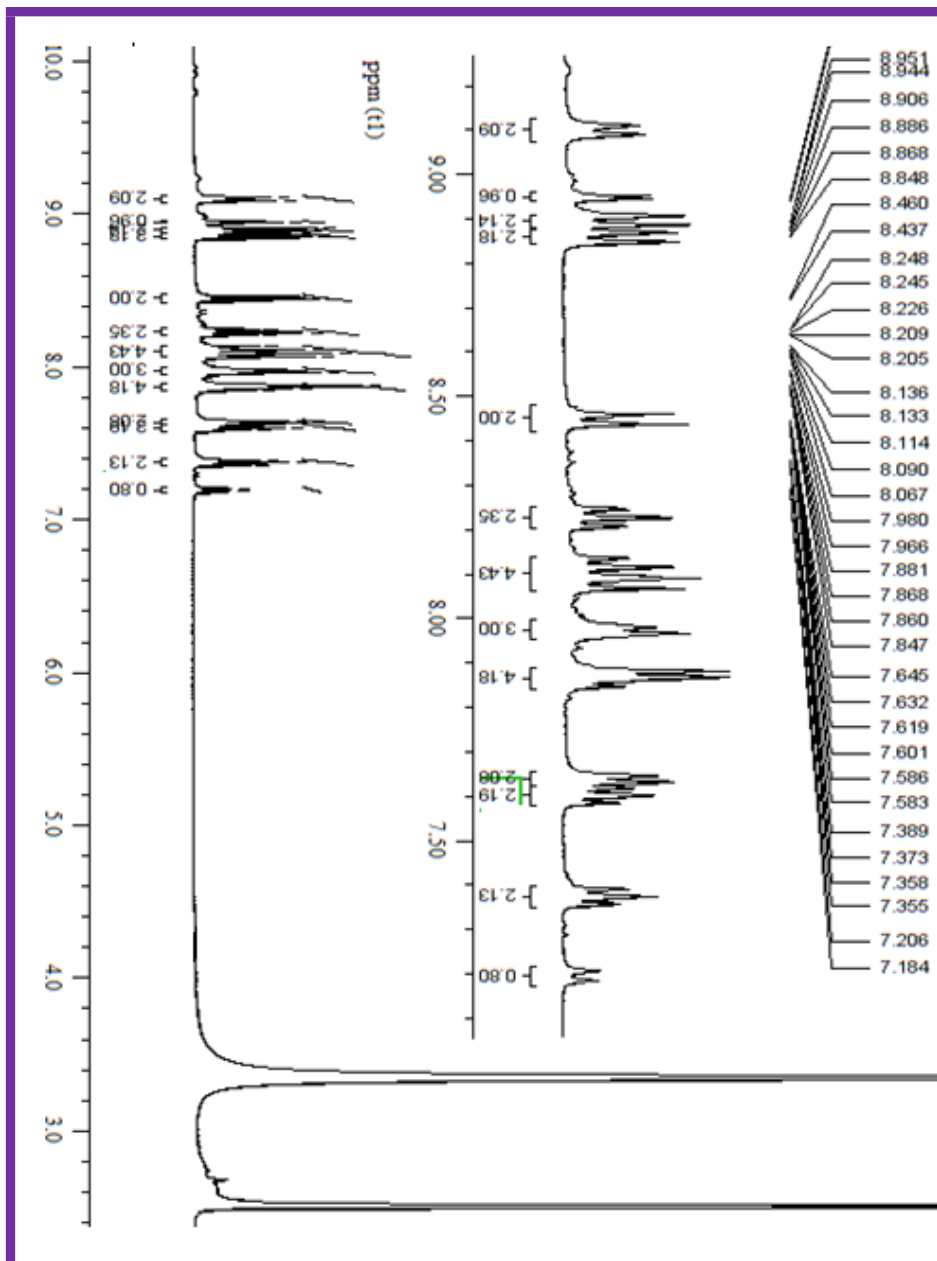

Figure S6.  $^1\text{H}$  NMR spectrum of **1**

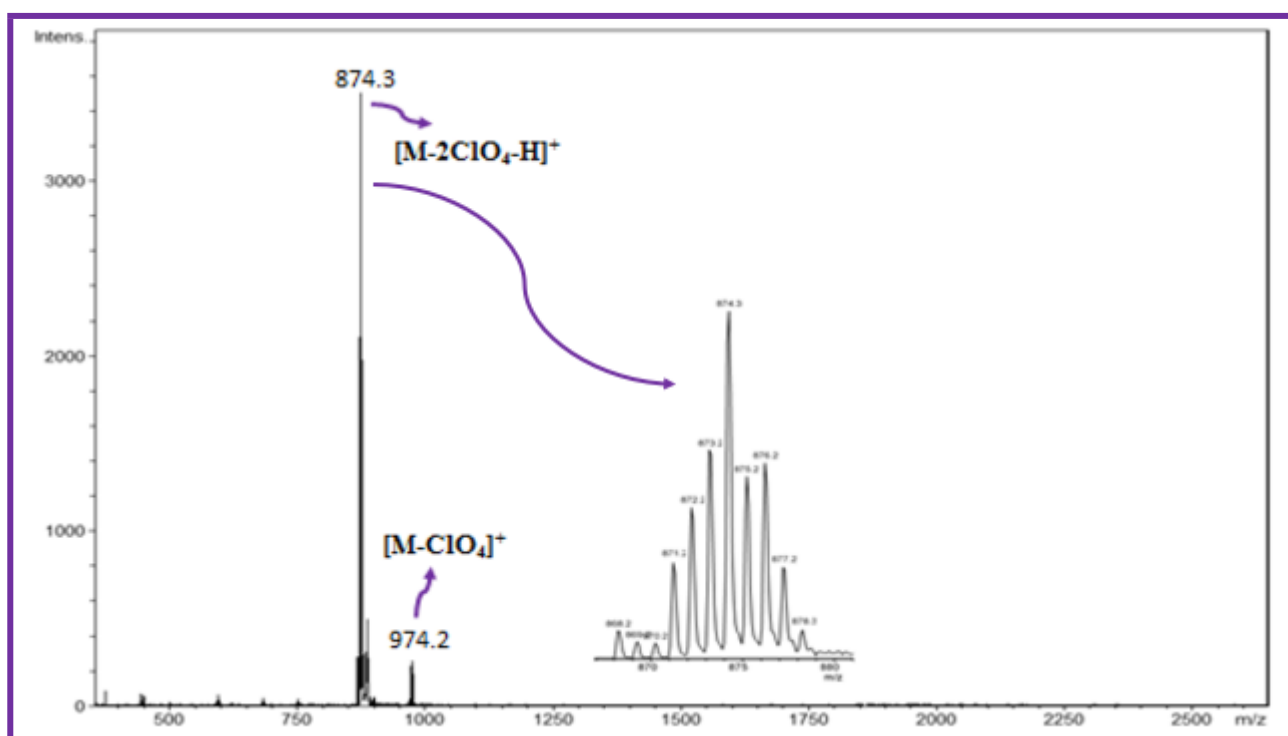

Figure S7. MALDI-TOF mass spectrum of 1



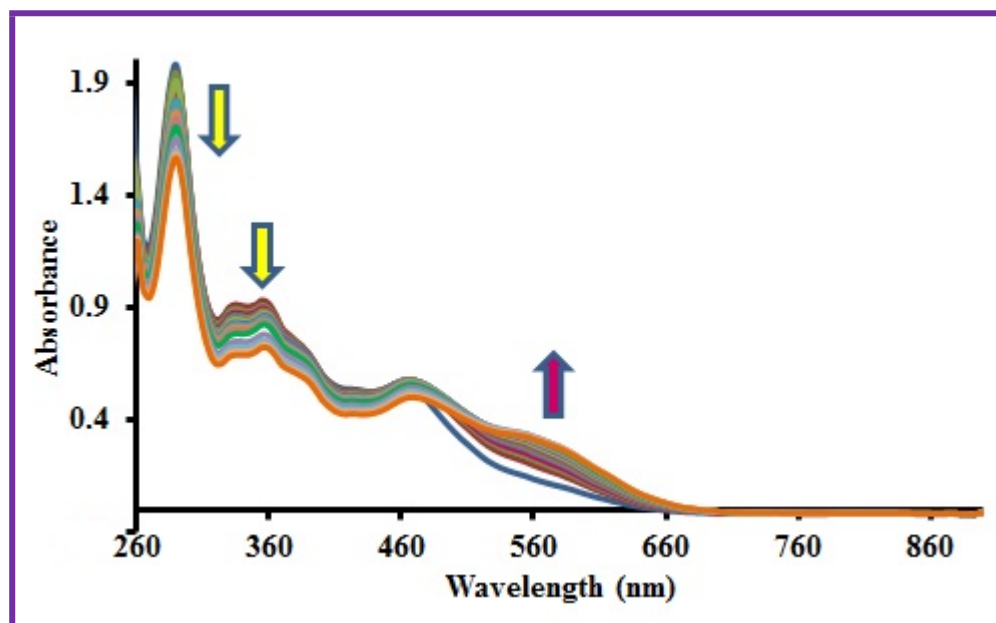

**Figure S8.** UV-Vis absorption spectra of sensor **1** ( $2 \times 10^{-5}$  mol L<sup>-1</sup>) in dry DMSO upon addition of H<sub>2</sub>PO<sub>4</sub> (0-5 equiv.).

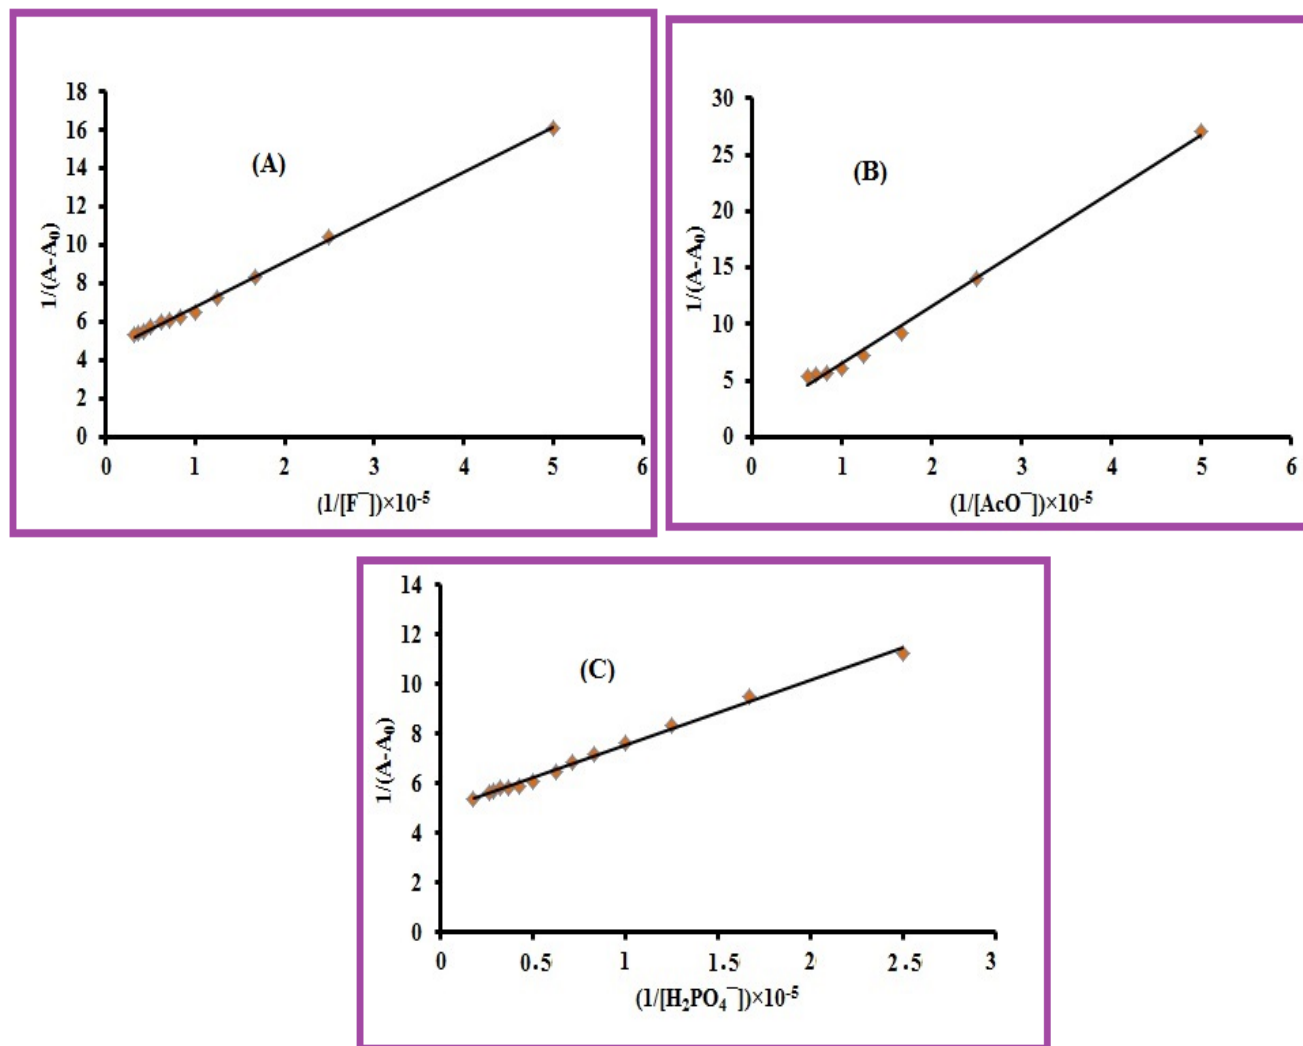

**Figure S9.** Benesi–Hildebrand plots of sensor **1** with (A)  $F^-$ , (B)  $AcO^-$  and (C)  $H_2PO_4^-$  anions associated with absorbance change at 560 nm in DMSO.

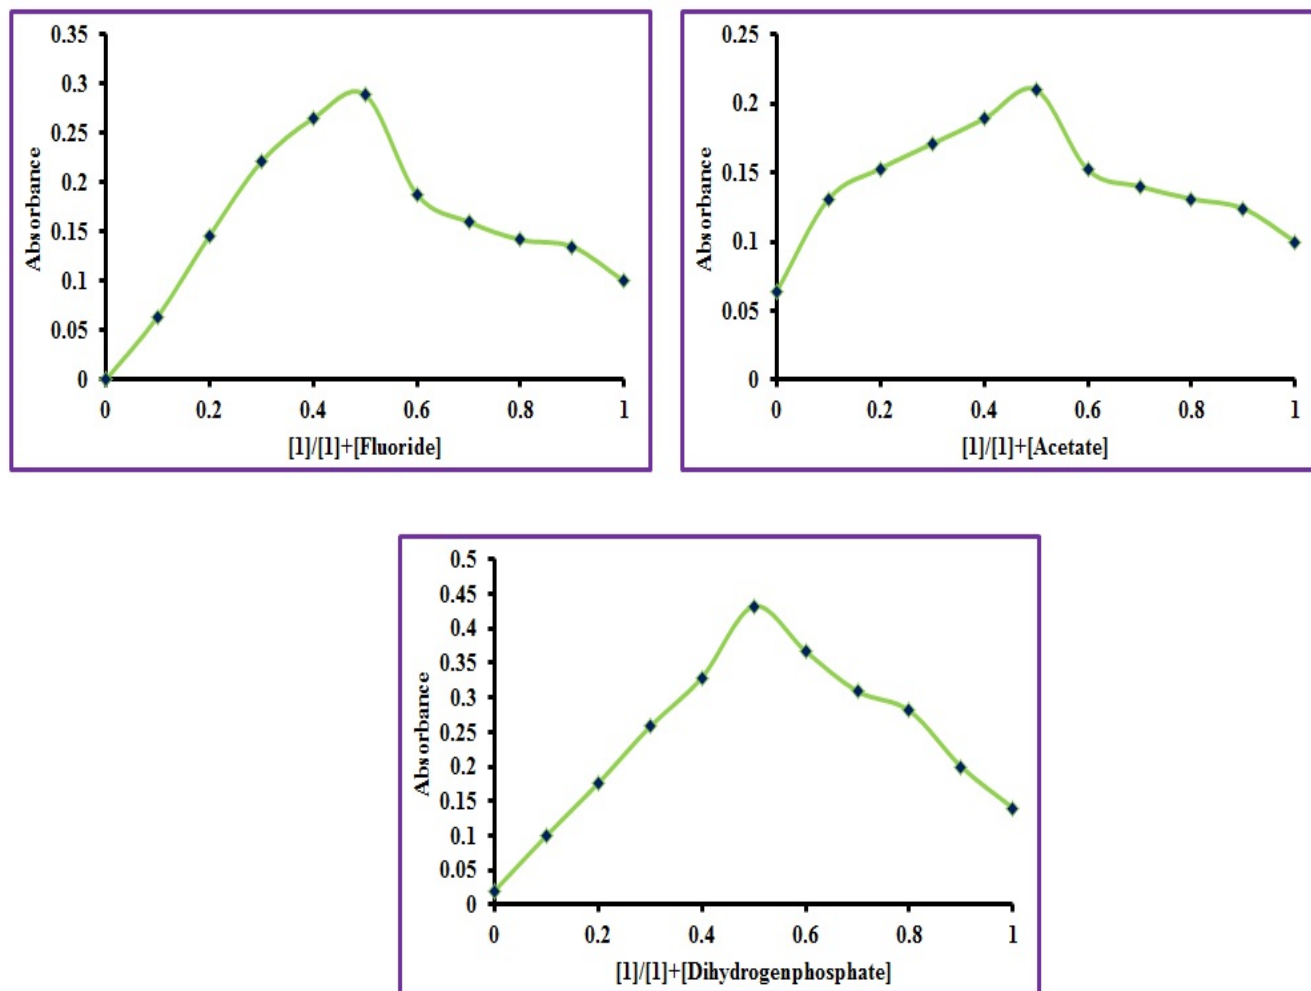

**Figure S10.** Job's plot for sensor 1 and anions with a total concentration of  $2.0 \times 10^{-5}$  M in DMSO at 560 nm.

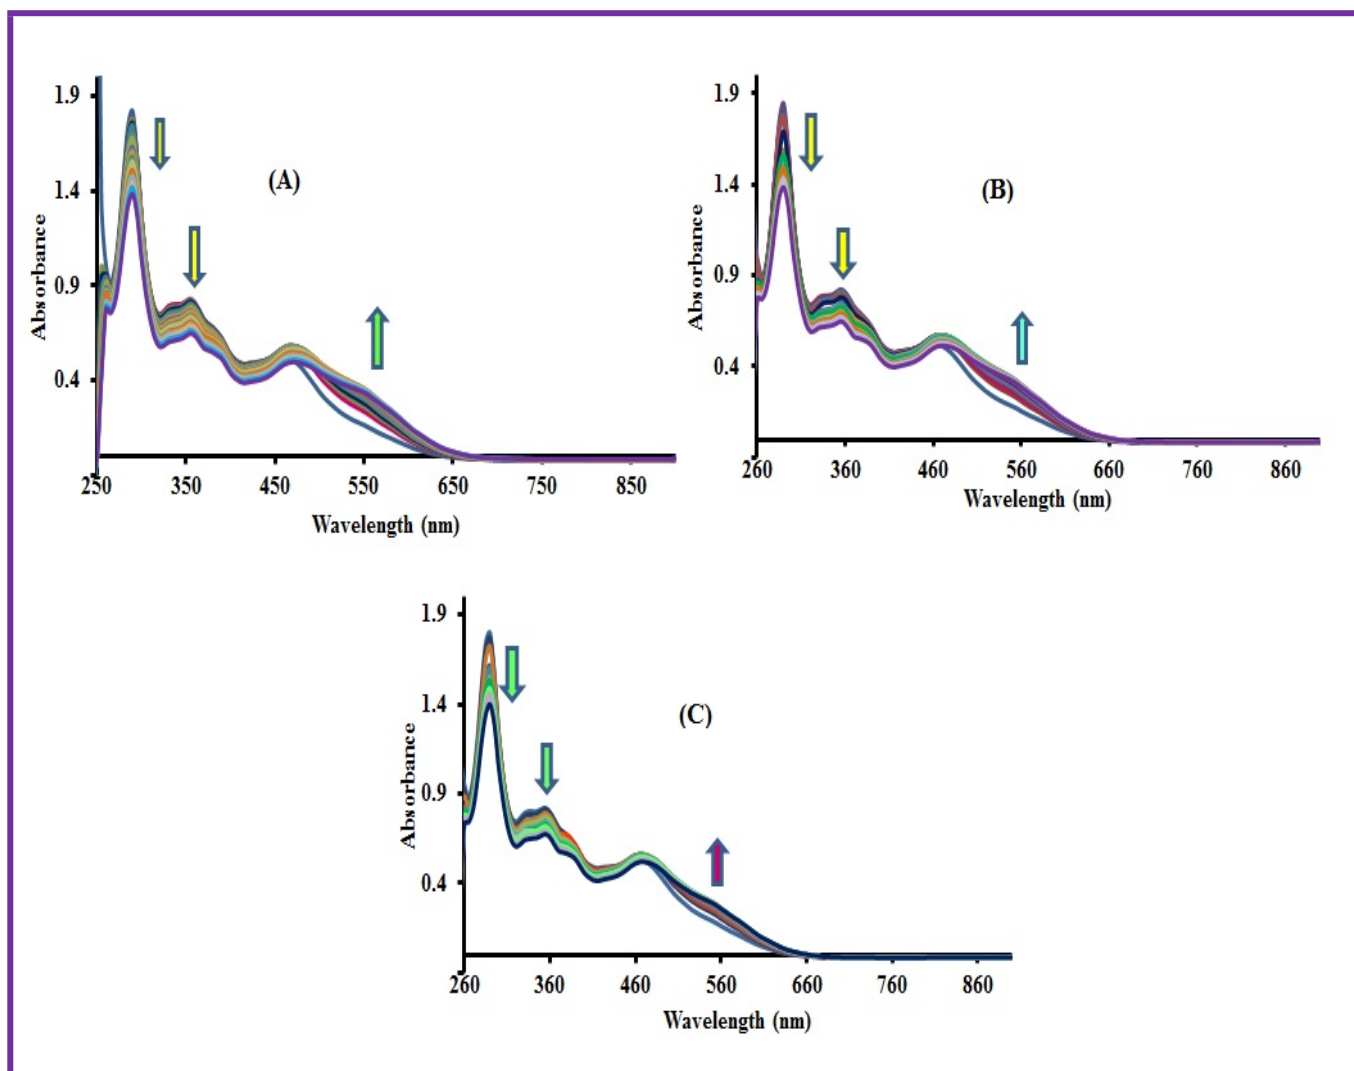

**Figure S11.** UV-Vis absorption spectra of sensor 1 ( $2 \times 10^{-5}$  mol L<sup>-1</sup>) in 9:1, DMSO-water upon addition of (A) TBAF, (B) TBAOAc and (C) TBAH<sub>2</sub>PO<sub>4</sub> (0-5 equiv.).

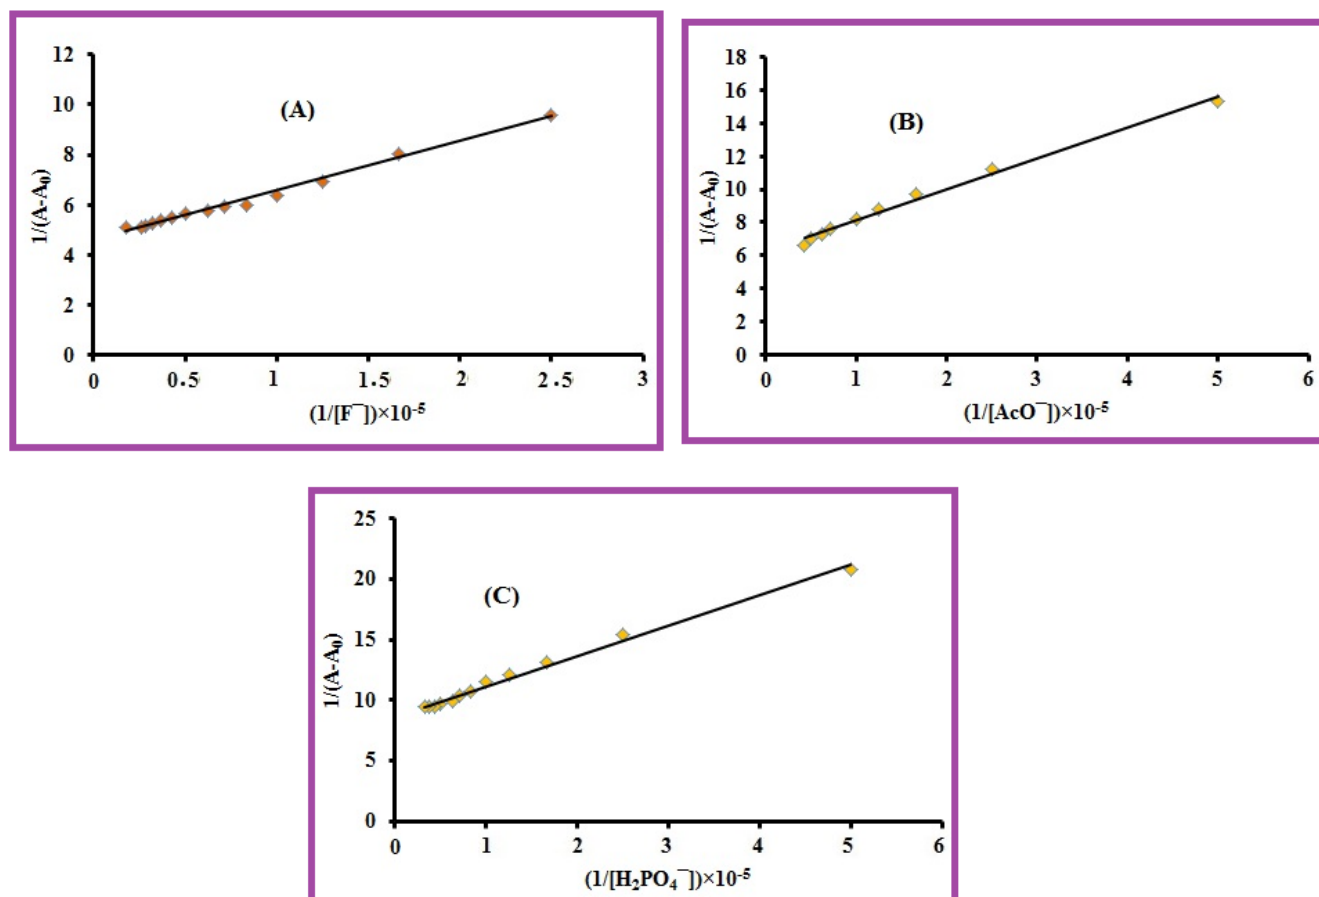

**Figure S12.** Benesi–Hildebrand plots of sensor **1** with (A) TBAF, (B) TBAOAc and (C) TBAH<sub>2</sub>PO<sub>4</sub> associated with absorbance change at 560 nm in 9:1, DMSO-water.

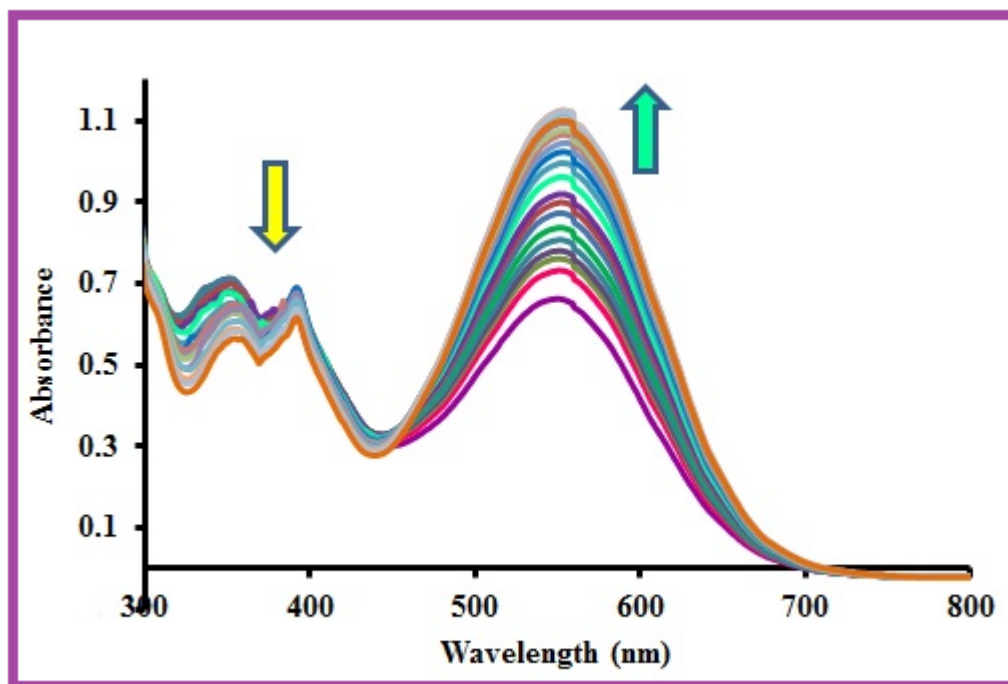

(A)

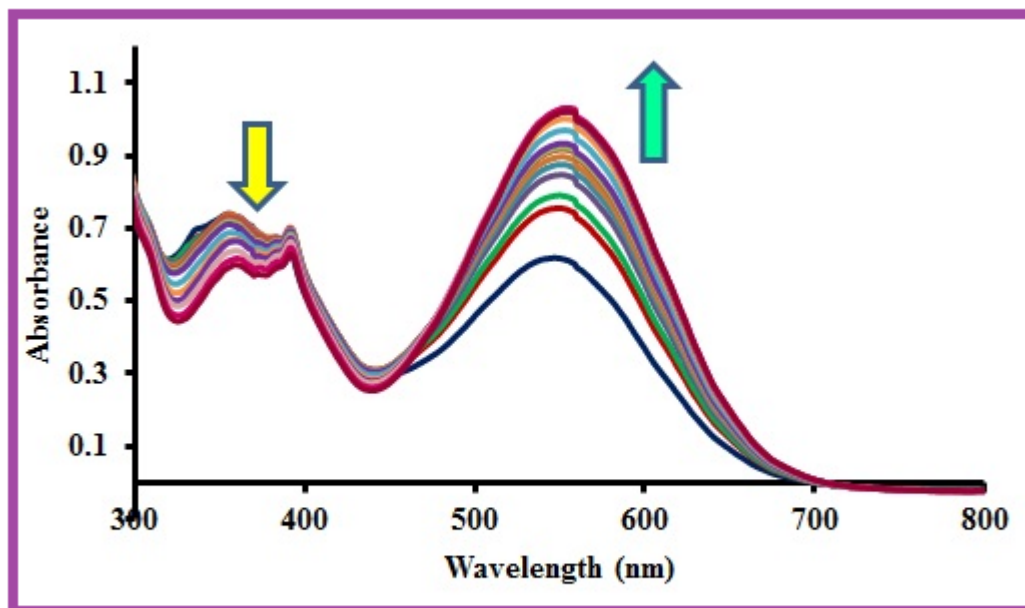

(B)

**Figure S13.** UV-Vis absorption spectra of sensor L ( $2 \times 10^{-5} \text{ mol L}^{-1}$ ) in DMSO upon addition of (A) TBAOAc and (B) TBAH<sub>2</sub>PO<sub>4</sub> (0-5 equiv.).

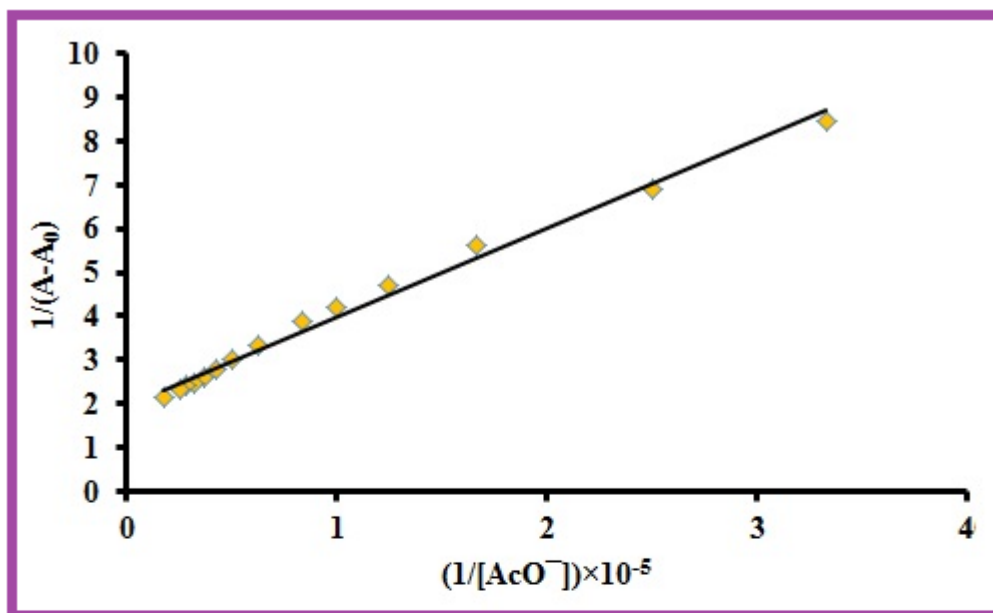

(A)

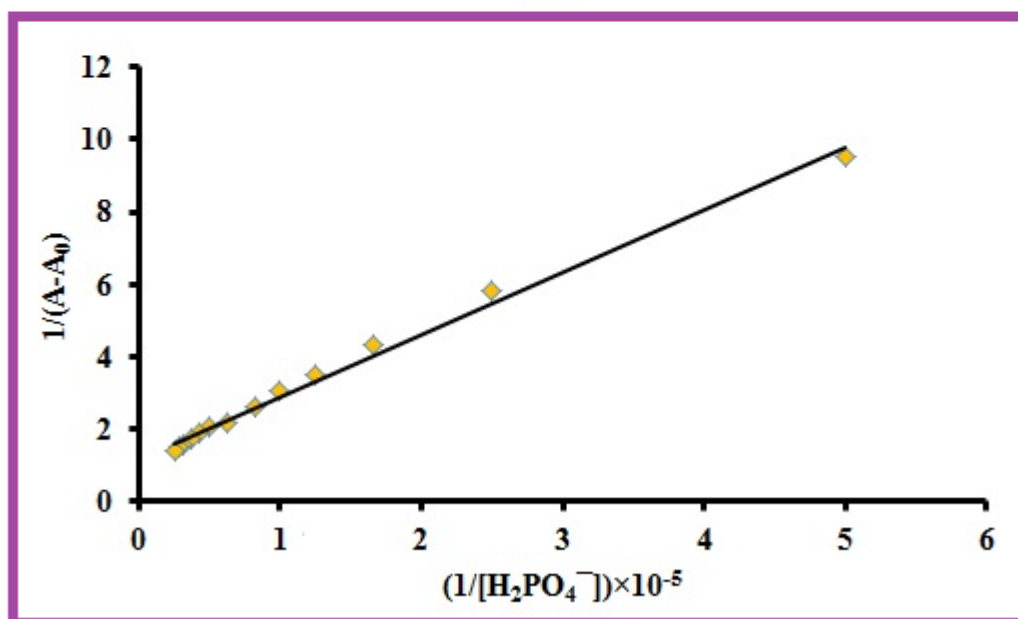

(B)

**Figure S14.** Benesi-Hildebrand plots of sensor **L** with (A) TBAOAc and (B) TBAH<sub>2</sub>PO<sub>4</sub> anions associated with absorbance change at 552 nm in DMSO.

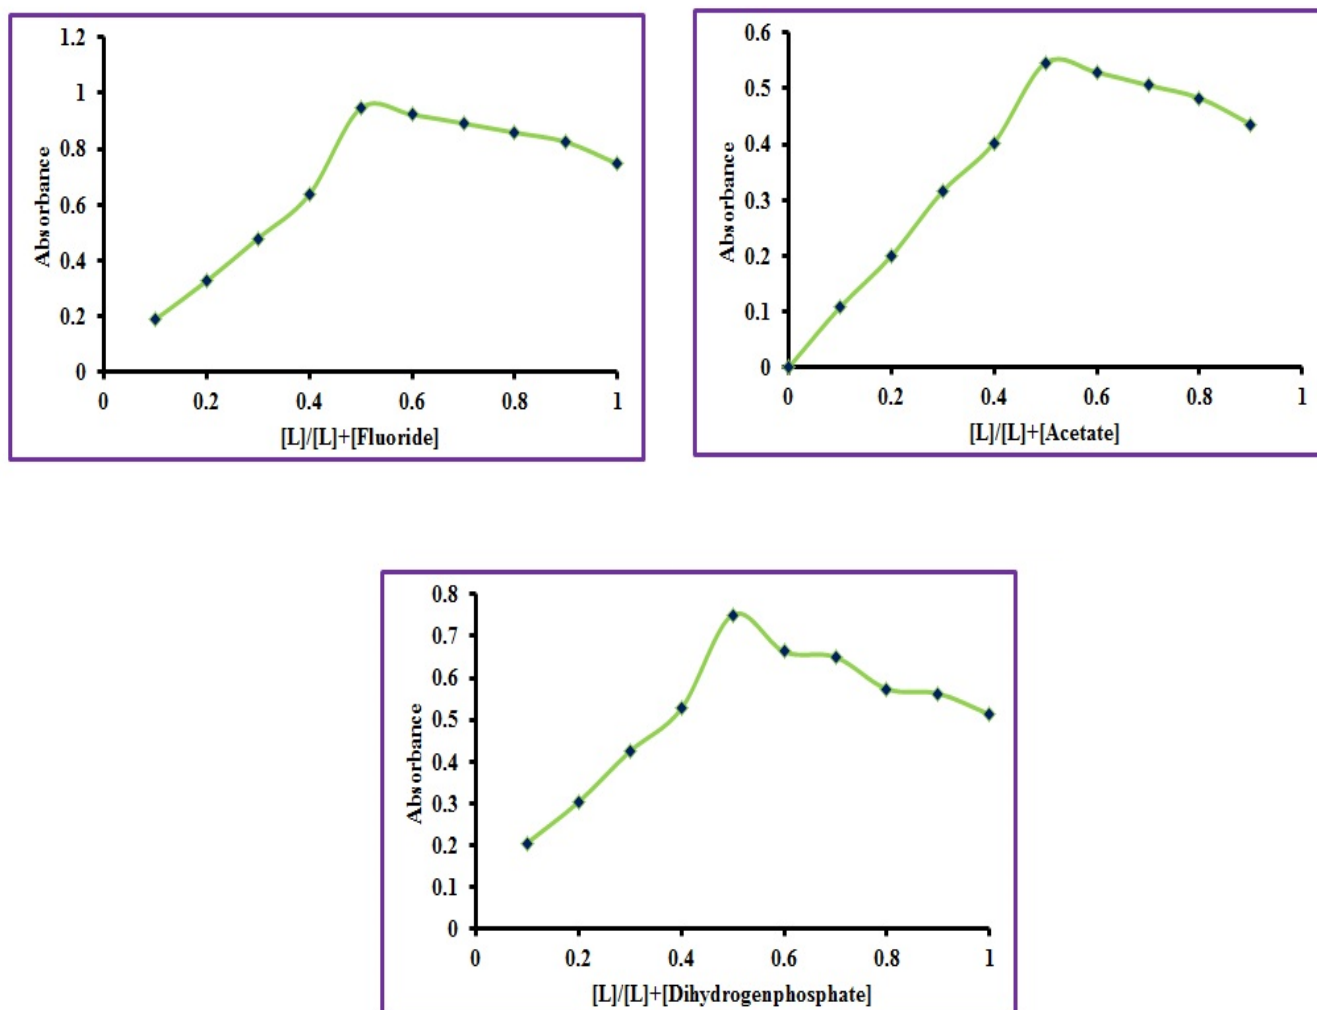

**Figure S15.** Job's plot for sensor **L** and anions with a total concentration of  $2.0 \times 10^{-5}$  M in DMSO at 552 nm.



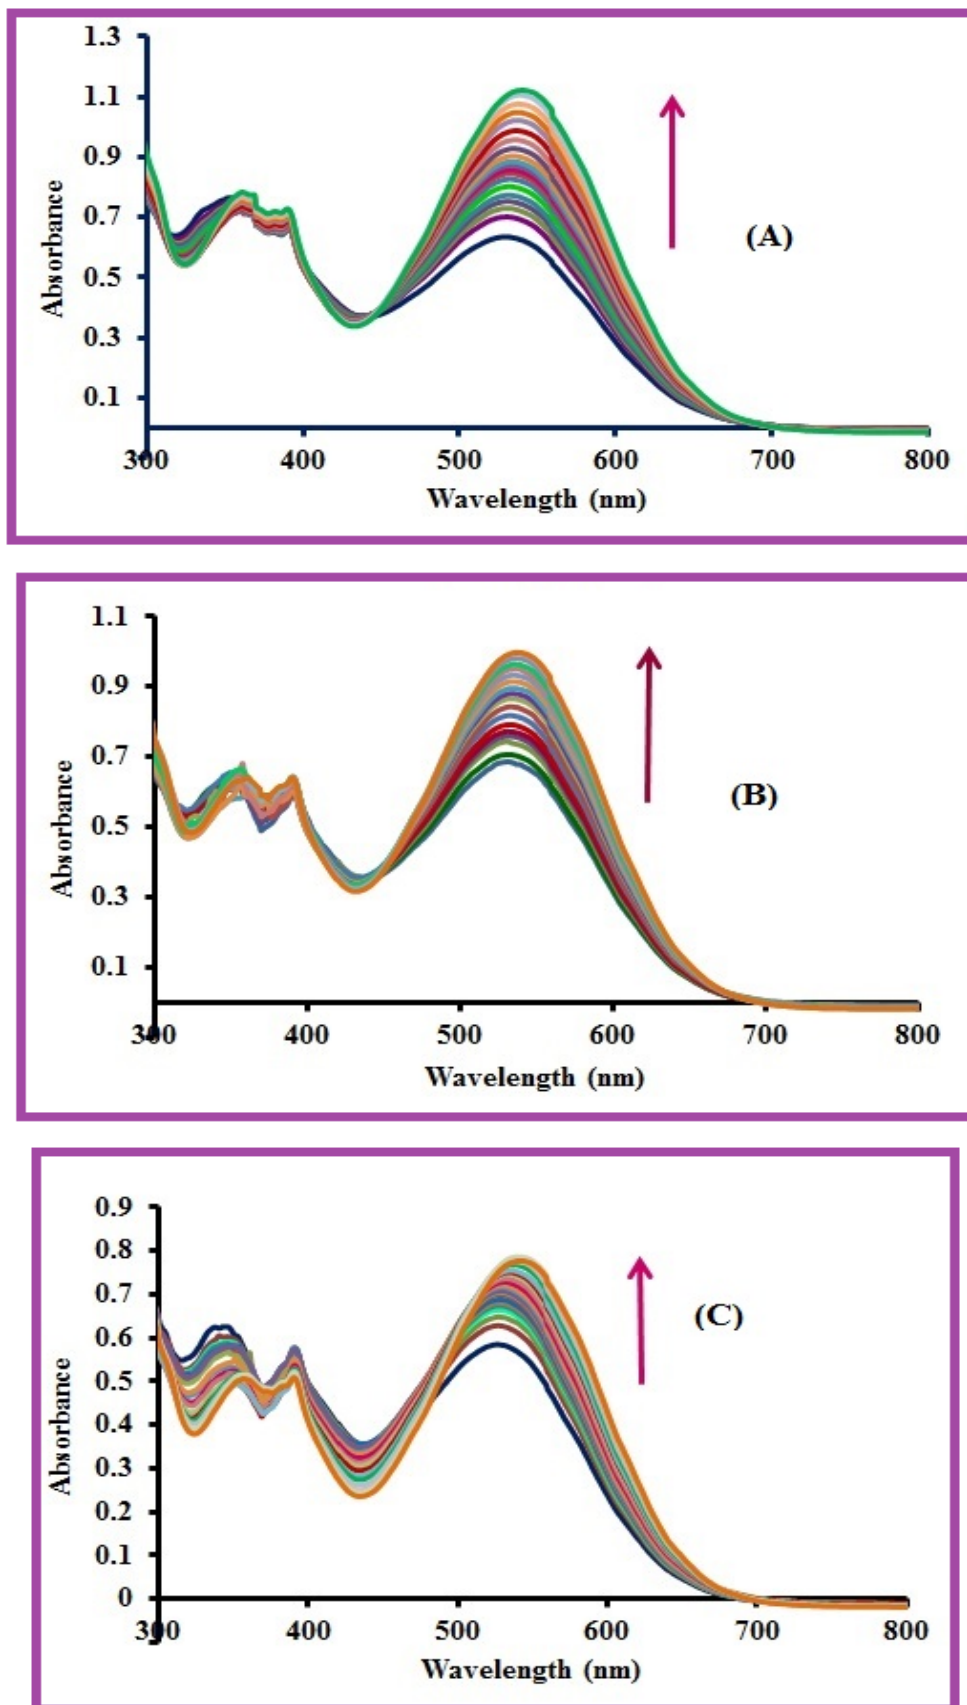

**Figure S16.** UV-Vis absorption spectra of sensor L ( $2 \times 10^{-5}$  mol L<sup>-1</sup>) in 9:1, DMSO-water upon addition of (A) TBAF, (B) TBAOAc and (C) TBAH<sub>2</sub>PO<sub>4</sub> (0-5 equiv.).

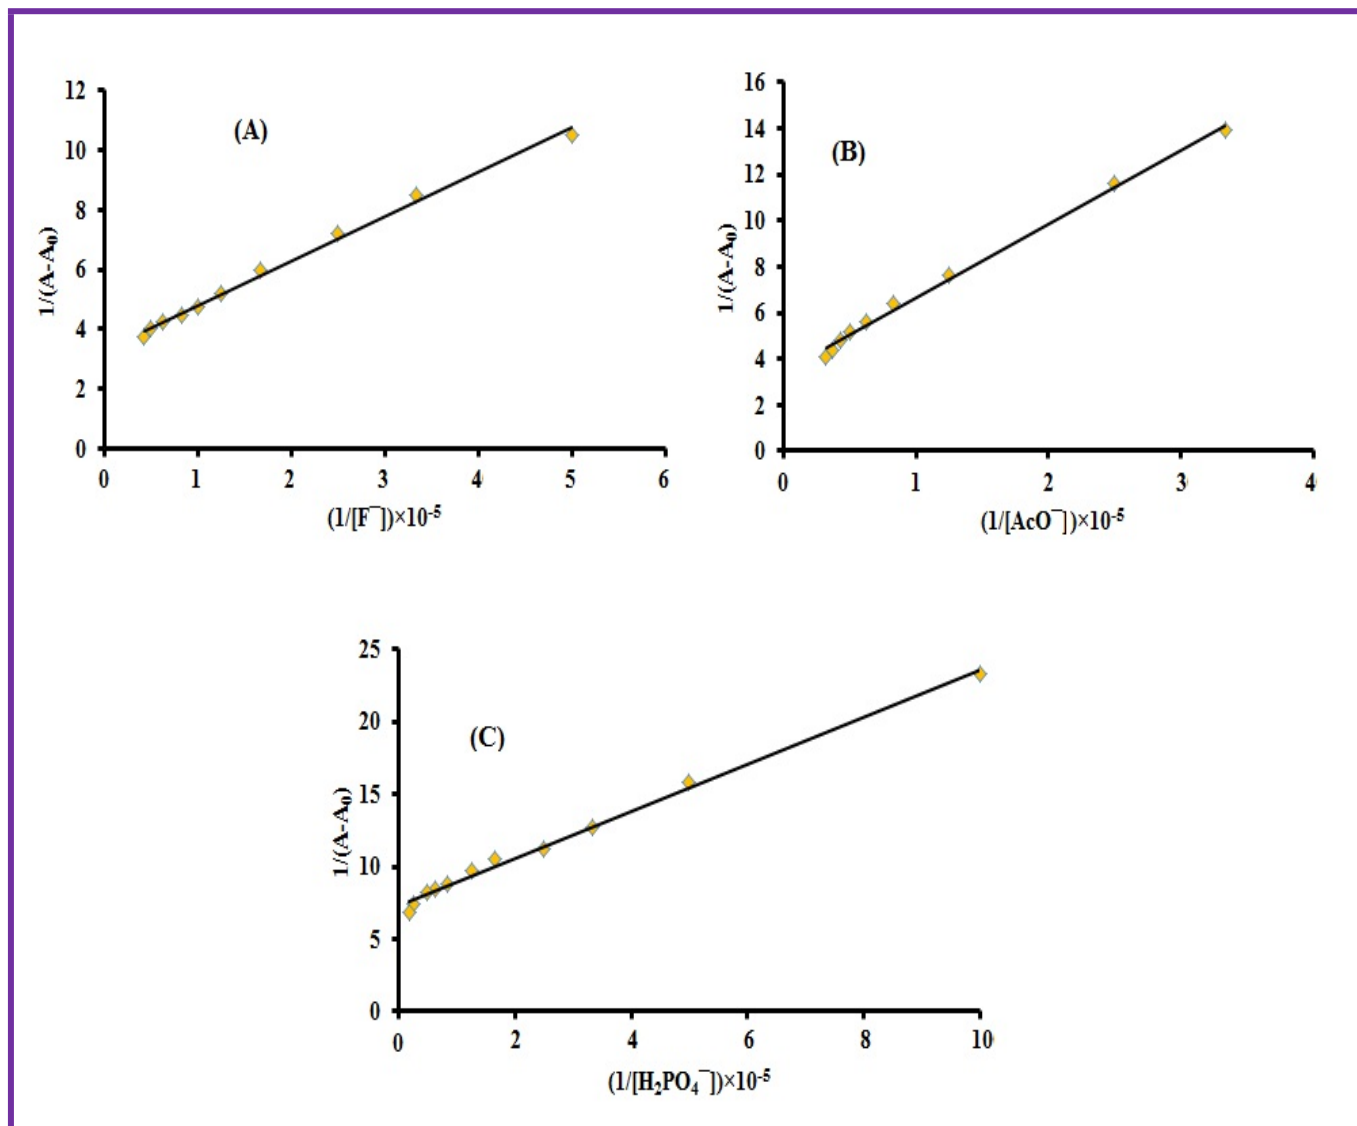

**Figure S17.** Benesi–Hildebrand plots of sensor **L** with (A) TBAF, (B) TBAOAc and (C) TBAH<sub>2</sub>PO<sub>4</sub> associated with absorbance change at 529 nm in 9:1, DMSO-water.

### Determination of the $pK_a$ value:

To determine the  $pK_a$  values of **L** and **1**, the spectrophotometric pH titrations were carried out in 9:1 DMSO-Water. The values were assigned as the maxima of the first derivative of the data shown in **Figure S18** (The inset shows the plot of the derivatives of the titrations).

(*J. Am. Chem. Soc.* **2000**, *122*, 6769-6770)

The  $pK_a$  values were determined to be  $\sim 10.25$  for **L** and 8.33 for **1** (on the basis of new band formed at 552 and 560 nm for **L** and **1**, respectively) indicating that **L** and **1** likely are deprotonated with relatively basic anions.

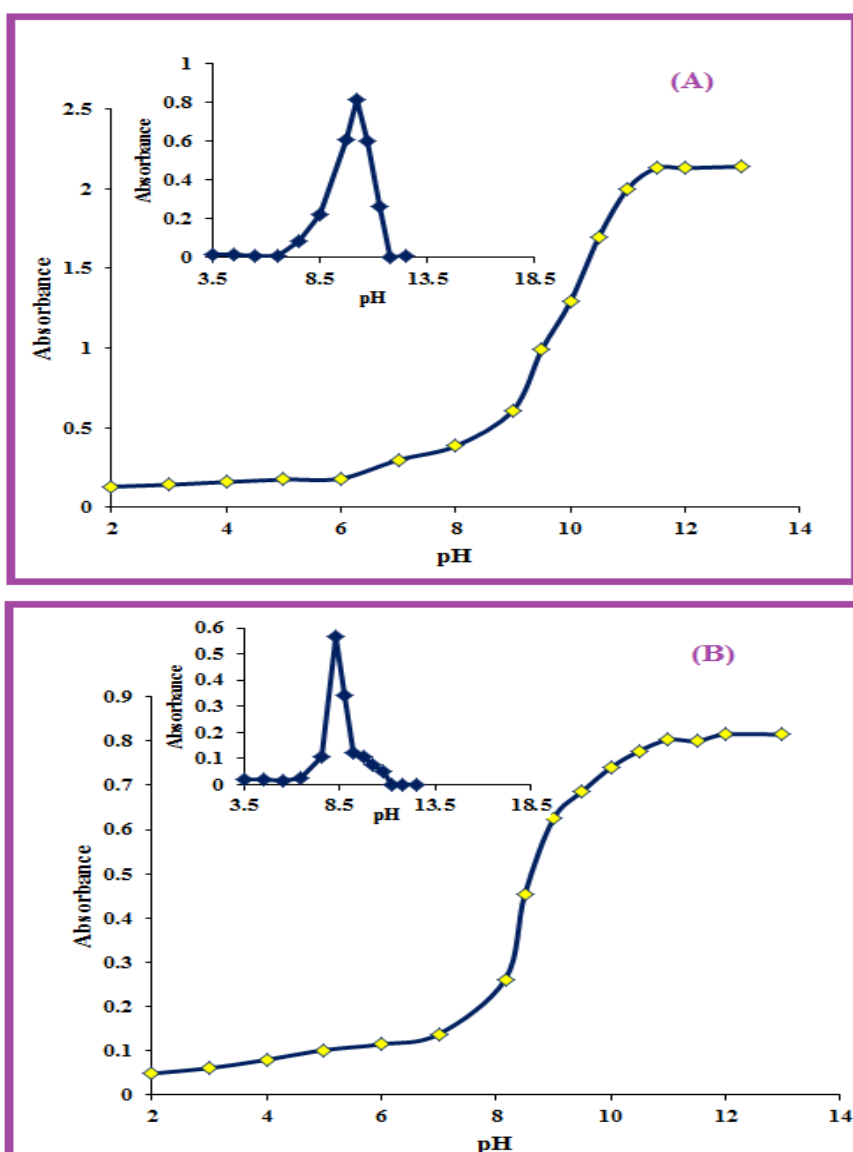

Figure S18. (A) **L** and (B) **1**

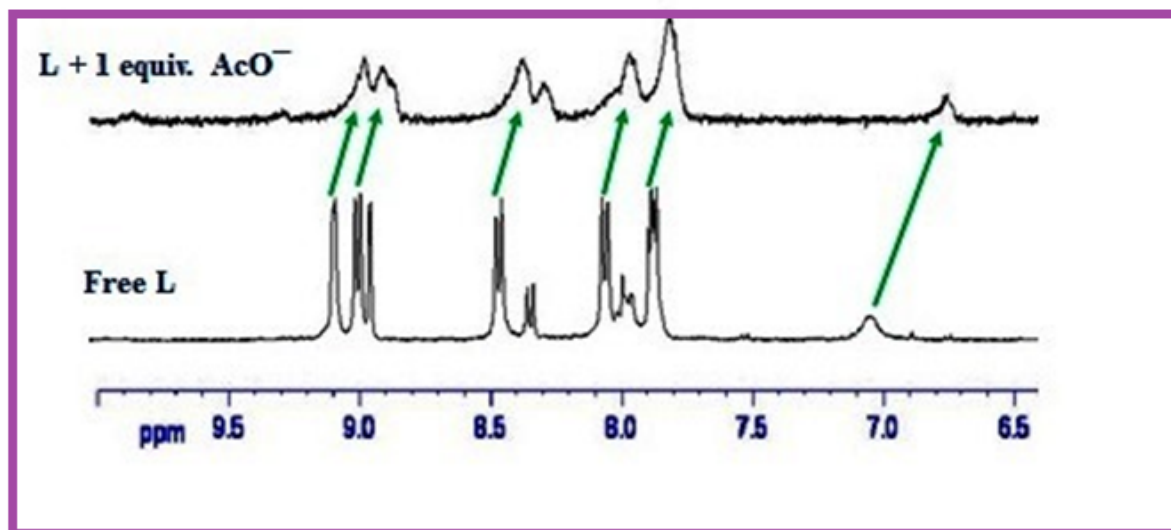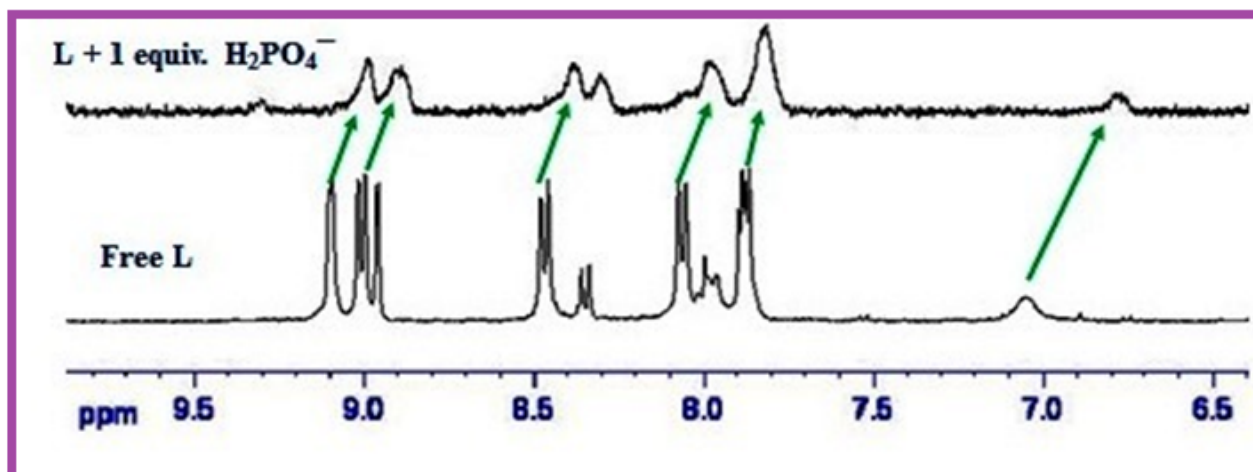

**Figure S19.** <sup>1</sup>H NMR spectra of L in DMSO-*d*<sub>6</sub> ( $2 \times 10^{-2}$  mol L<sup>-1</sup>) in the absence and presence of TBAOAc and TBAH<sub>2</sub>PO<sub>4</sub>

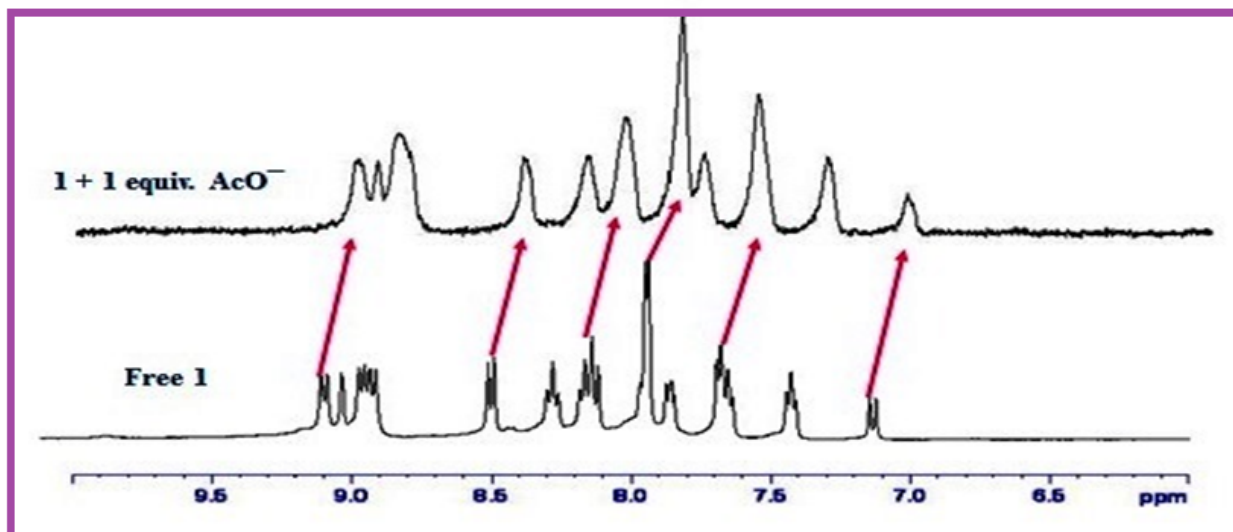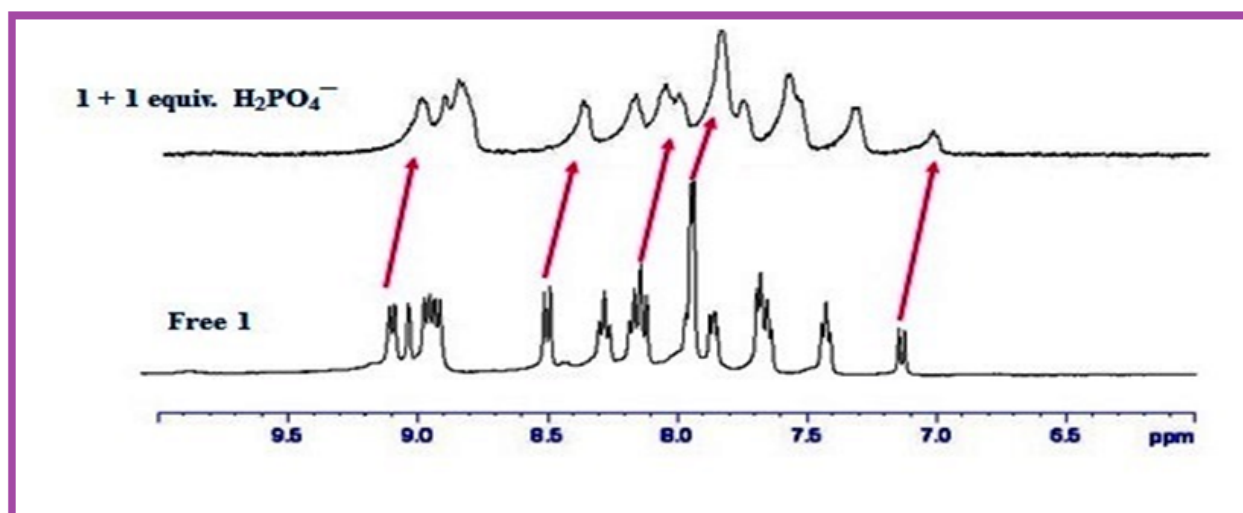

**Figure S20.** <sup>1</sup>H NMR spectra of **1** in DMSO-*d*<sub>6</sub> ( $2 \times 10^{-2}$  mol L<sup>-1</sup>) in the absence and presence of TBAOAc and TBAH<sub>2</sub>PO<sub>4</sub>

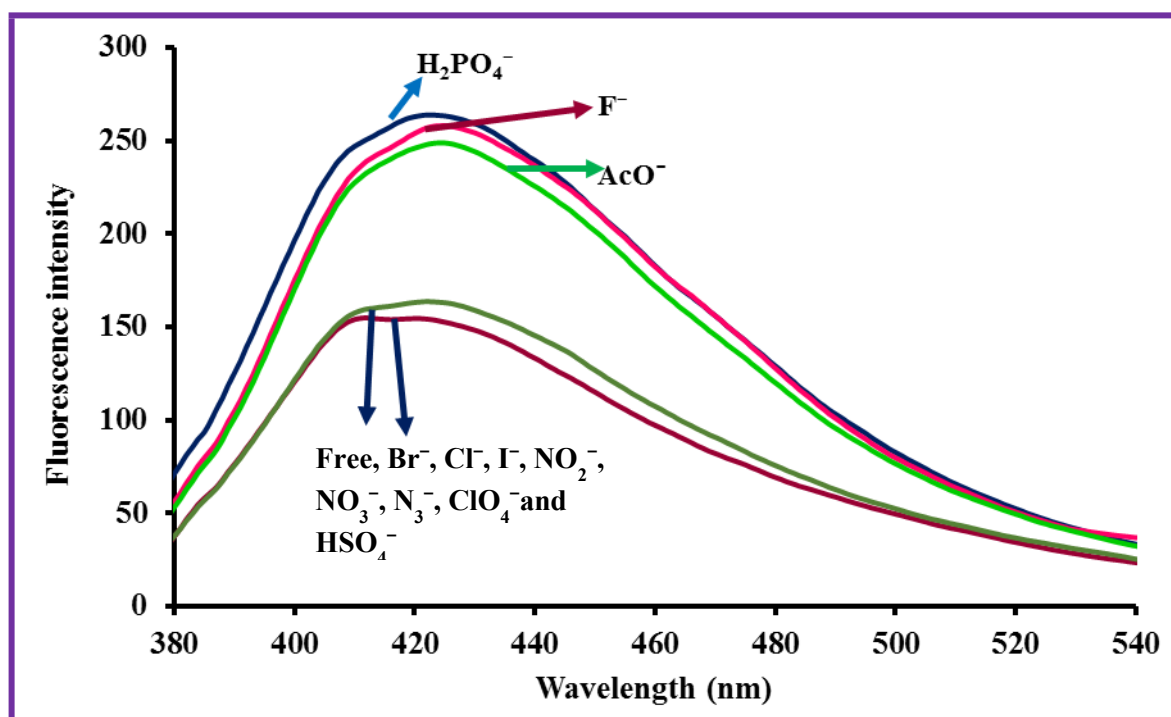

**Figure S21.** Fluorescence spectra of L ( $2 \times 10^{-5} \text{ mol L}^{-1}$ ) in the presence of the different anions
